# Supplementary material for: Bitis arietans Snake Venom and Kn-Ba, a Snake Venom Serine Protease, Induce the Production of Inflammatory Mediators in THP-1 Macrophages
Source: MDPI journal article supplement (doi:10.3390/toxins13120906), 2021-12-16
Supplement: s1 [file s1]

# ***Bitis arietans* Snake Venom and Kn-Ba, a Snake Venom Serine Protease, Induce the Production of Inflammatory Mediators in THP-1 Macrophages**

Ângela Alice Amadeu Megale <sup>1\*</sup>, Fabio Carlos Magnoli <sup>1</sup>, Felipe Raimondi Guidolin <sup>1</sup>, Kemily Stephanie Godoi <sup>1</sup>, Fernanda Calheta Vieira Portaro <sup>2\*</sup> and Wilmar Dias-da-Silva <sup>1\*</sup>

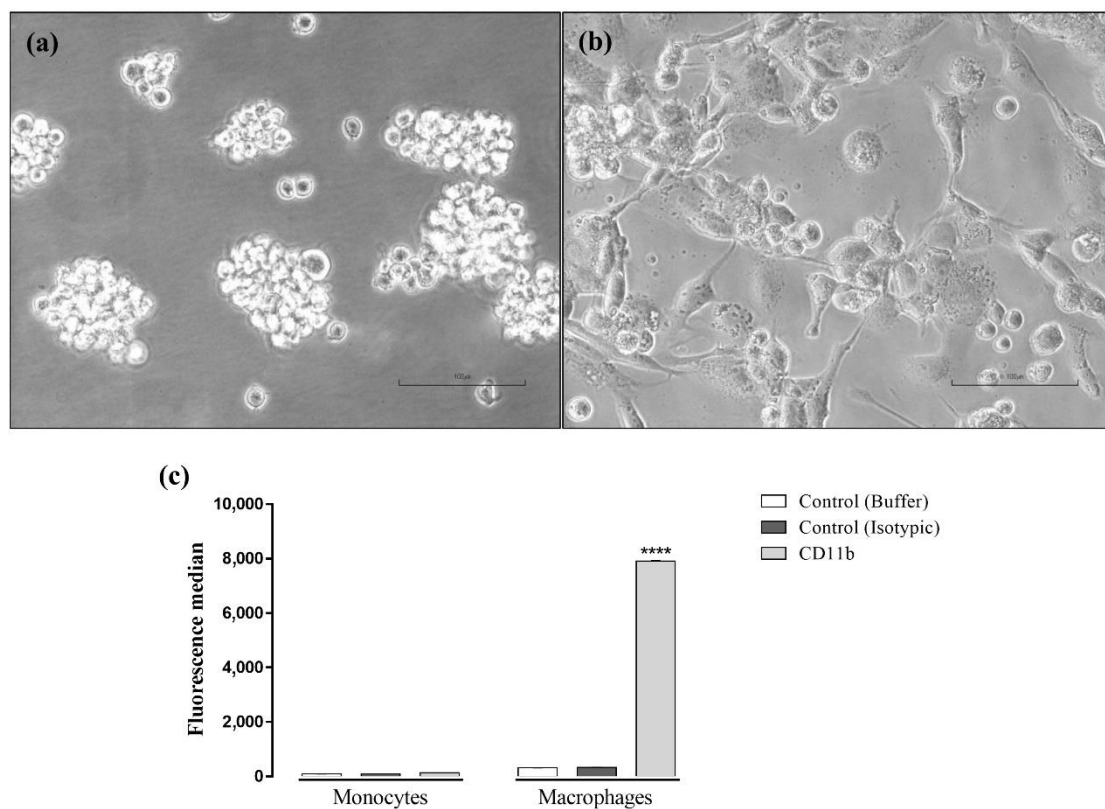

**Figure S1.** Differentiation of THP-1 macrophages. (A) Human pre-monocytes of the THP-1 lineage were cultured in 75 cm<sup>3</sup> bottles containing supplemented RPMI medium. The cells were kept in an incubator at 37 °C and 5% CO<sub>2</sub>, at a concentration of 2–8 × 10<sup>5</sup> cells/mL. (B) Macrophages were differentiated from THP-1 pre-monocytes with 100 ng/mL PMA for 3 days, followed by a 4-day rest period in the absence of PMA. 200× magnification. (C) CD11b expression in differentiated THP-1 macrophages. Adherent THP-1 macrophages differentiated with PMA and pre-monocytes in suspension were analyzed for CD11b expression by flow cytometry. Result expressed as mean of duplicates ± SEM and analyzed by two-way ANOVA followed by Tukey's post-test. (\*) Significant difference in relation to the respective controls ( $p < 0.0001$ ).
