# Supplementary material for: Bitis arietans Snake Venom and Kn-Ba, a Snake Venom Serine Protease, Induce the Production of Inflammatory Mediators in THP-1 Macrophages
Source: MDPI journal article supplement (doi:10.3390/toxins13120906), 2021-12-16
Supplement: s1 [file s1]

# ***Bitis arietans* Snake Venom and Kn-Ba, a Snake Venom Serine Protease, Induce the Production of Inflammatory Mediators in THP-1 Macrophages**

Ângela Alice Amadeu Megale <sup>1\*</sup>, Fabio Carlos Magnoli <sup>1</sup>, Felipe Raimondi Guidolin <sup>1</sup>, Kemily Stephanie Godoi <sup>1</sup>, Fernanda Calheta Vieira Portaro <sup>2\*</sup> and Wilmar Dias-da-Silva <sup>1\*</sup>

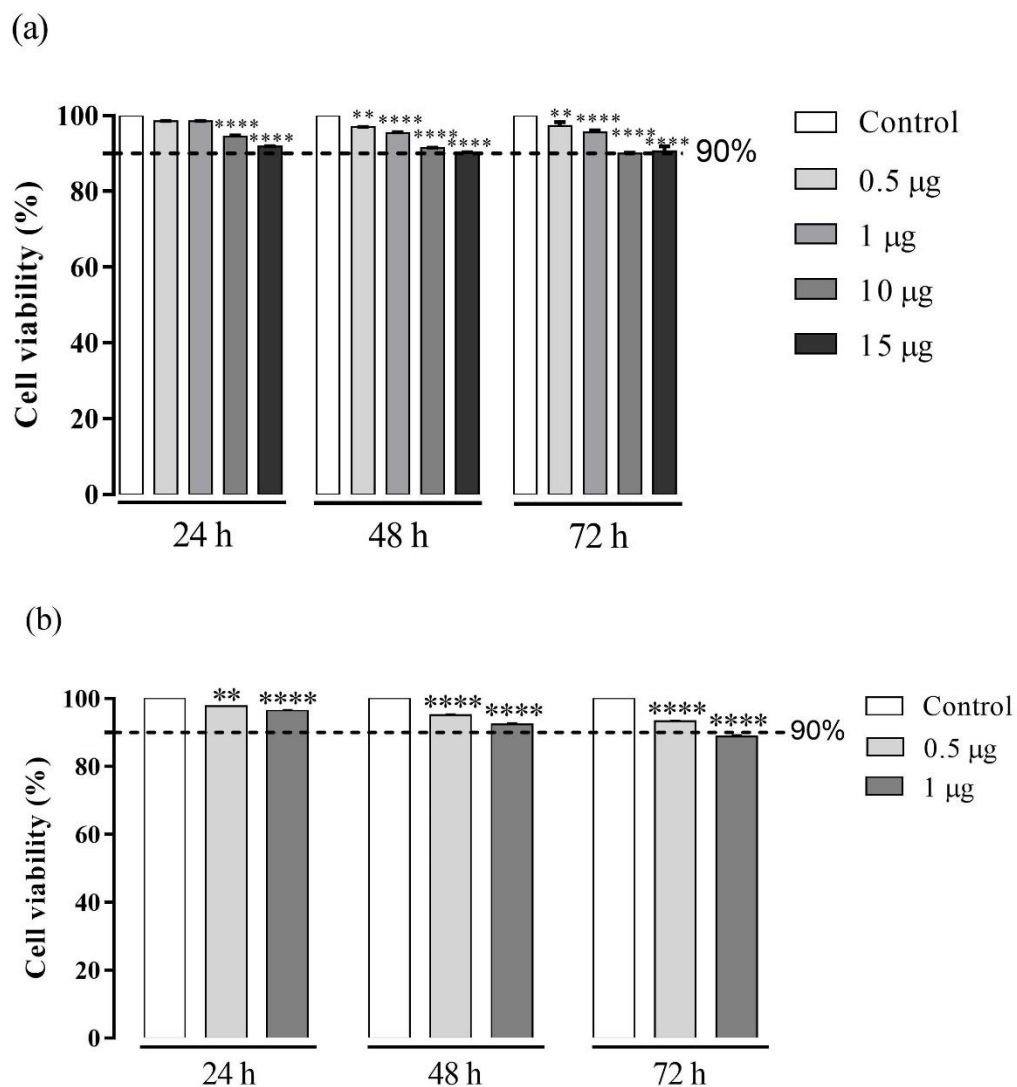

**Figure S2.** Cell cytotoxicity. Differentiated THP-1 macrophages was treated with 0.5–15 µg/well of BaV or with 0.5 and 1 µg/well Kn-Ba for 24 h, 48 h, and 72 h, and cell viability was evaluated by the quantification of lactate dehydrogenase (LDH) enzyme in cell-free supernatants. Results expressed as mean of duplicates  $\pm$  SEM and analyzed by one-way ANOVA followed by Tukey's post-test. (\*) Significant difference in relation to the respective control.  $p < 0.01$  (\*\*), and  $p < 0.0001$  (\*\*\*\*).
